# Supplementary material for: A high conductivity ultrathin anion-exchange membrane with 500+ h alkali stability for use in alkaline membrane fuel cells that can achieve 2 W cm−2 at 80 °C
Source: Royal Society of Chemistry journal article supplement (doi:10.1039/c8ta04783a), 2018-01-01
Supplement: c8ta04783a1.pdf [file c8ta04783a1.pdf]

## ELECTRONIC SUPPLEMENTAL INFORMATION

### A high conductivity ultrathin anion-exchange membrane with 500+ h alkali stability for use in alkaline membrane fuel cells that can achieve $2 \text{ W cm}^{-2}$ at $80 \text{ }^\circ\text{C}$

Lianqin Wang, Marco Bellini, Hamish A. Miller, and John R. Varcoe

This document provides additional data in support of the main article

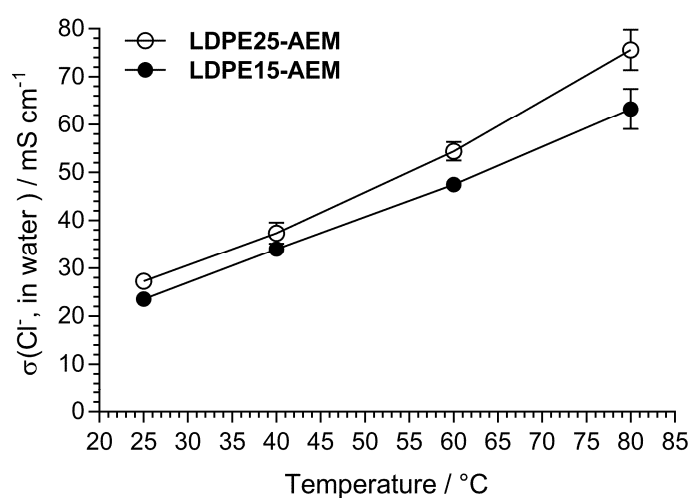

**Fig. S1** The 4-probe (in-plane) conductivities of **LDPE15-AEM** and **LDPE25-AEM** on the chloride anion forms submerged in water. Error bars are from measurements on  $n = 3$  samples of each anion form of the AEM (some error bars are smaller than the symbols).

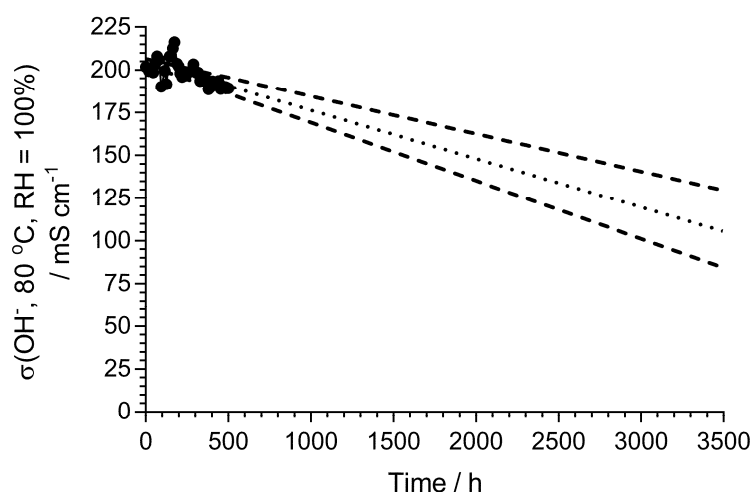

**Fig. S2** A 500 h *ex situ* stability test where **LDPE15-AEM** was maintained in the  $\text{OH}^-$  form at  $80 \text{ }^\circ\text{C}$  in a  $\text{N}_2$  ( $\text{CO}_2$ -free,  $\text{RH} = 100\%$ ) gas flow. The extended linear regression to 3500h is shown (dotted line) with the best- and worst-case scenarios donated with the dashed lines (based on the standard errors of the linear regression).

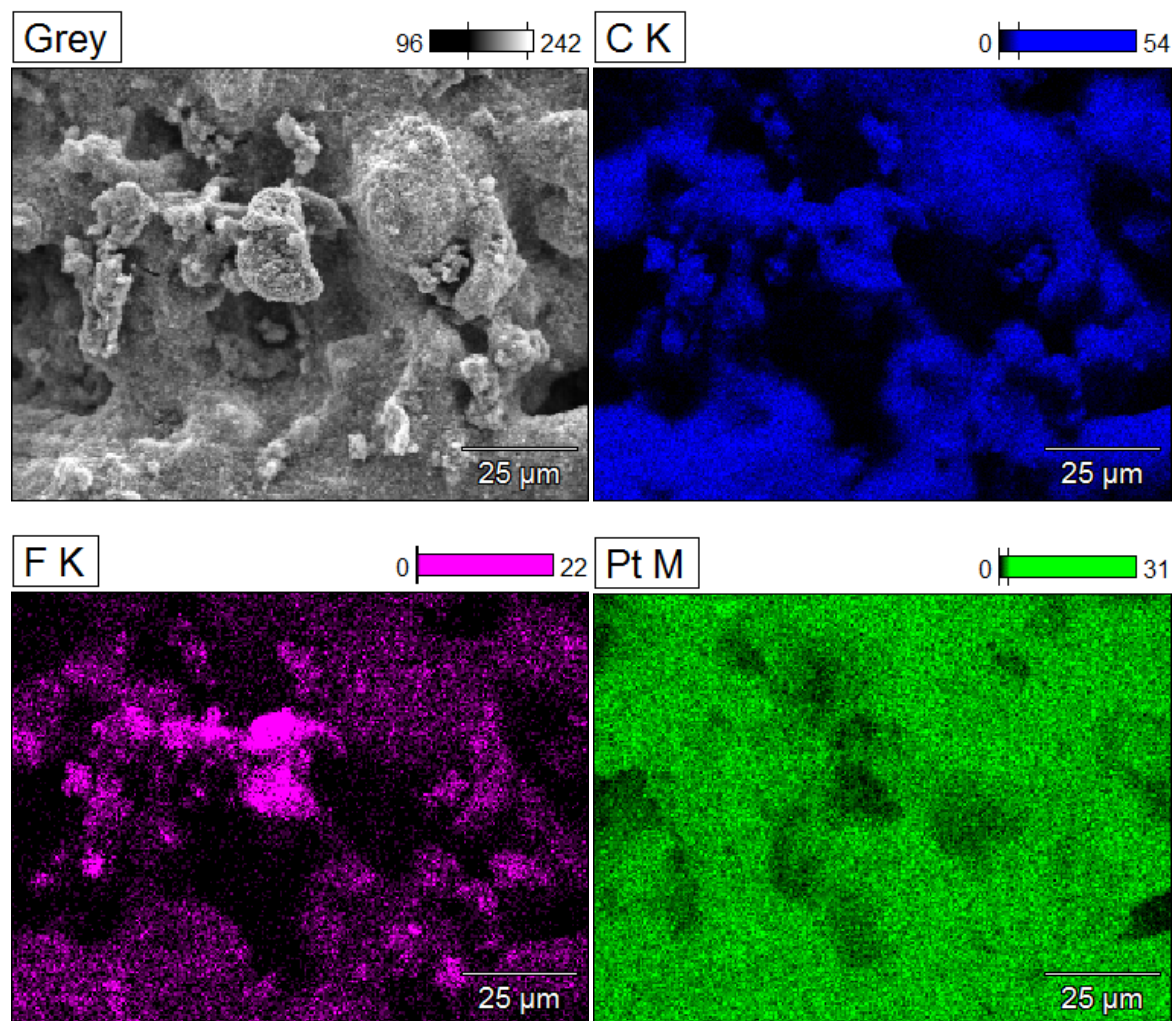

**Fig. S3** The scanning electron microscope image (SEM) and energy-dispersive X-ray spectroscopy (EDX) maps of a sample of the surface of the cathode electrode containing the Pt/C electrocatalyst (40% wt. metal content,  $0.40 \text{ mg cm}^{-2}$  metal loading) and the ETFE-based radiation grafted AEI ionomer powder (20% wt. in electrode,  $\text{IEC} = 1.26 \pm 0.06 \text{ mmol g}^{-1}$ ). These were recorded using a Noran system seven (ver. 3.1) ultradry SSD X-ray detector coupled to a JSM-7100F Field Emission SEM. Magnification = 1000 $\times$ .

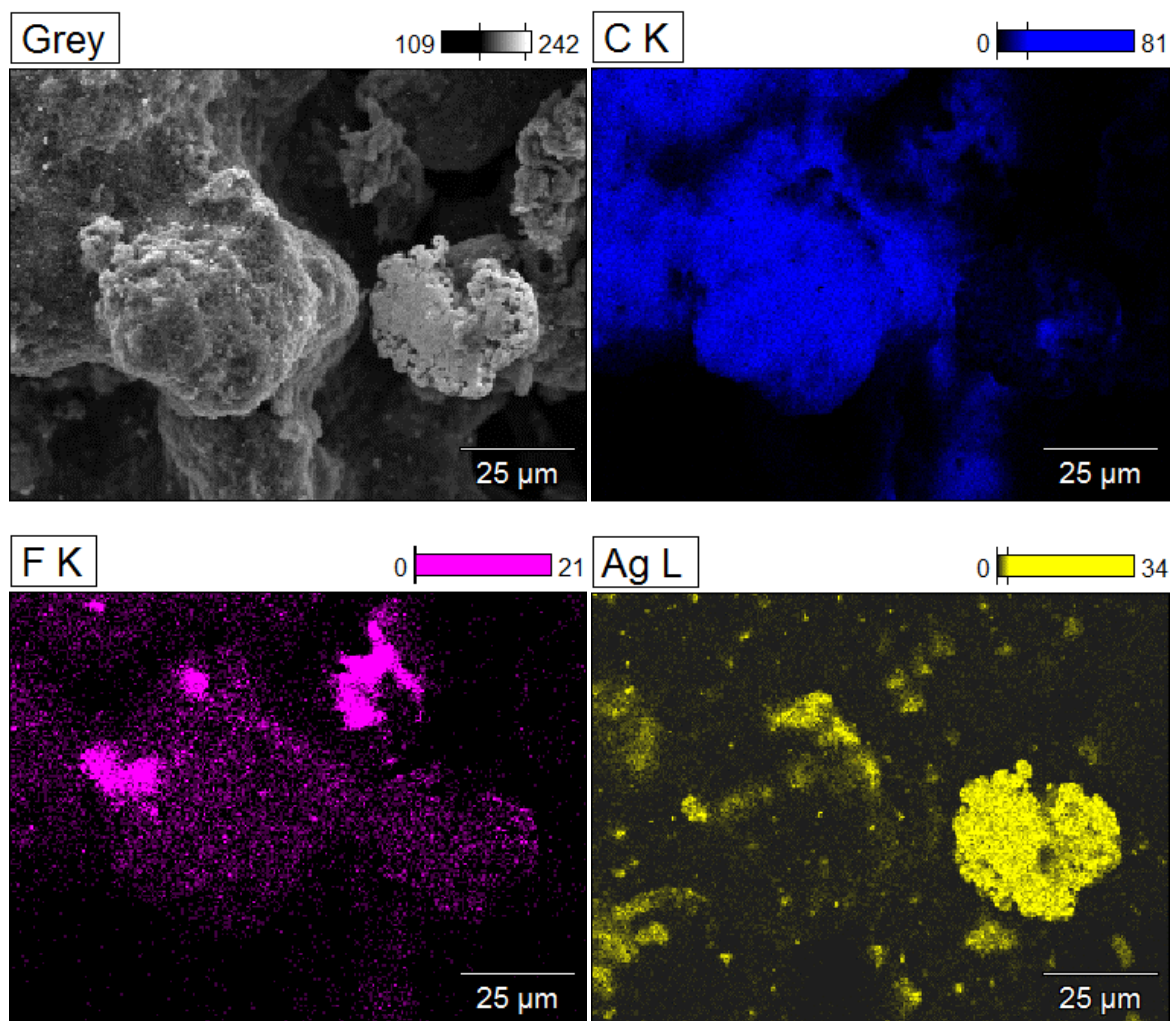

**Fig. S4** The scanning electron microscope image (SEM) and energy-dispersive X-ray spectroscopy (EDX) maps of a sample of the surface of the cathode electrode containing the Ag/C electrocatalyst (40% wt. metal content,  $0.86 \text{ mg cm}^{-2}$  metal loading) and the ETFE-based radiation grafted AEI ionomer powder (20% wt. in electrode,  $\text{IEC} = 1.26 \pm 0.06 \text{ mmol g}^{-1}$ ). These were recorded using a Noran system seven (v. 3.1) ultradry SSD X-ray detector coupled to a JSM-7100F Field Emission SEM. Magnification =  $1000\times$ .

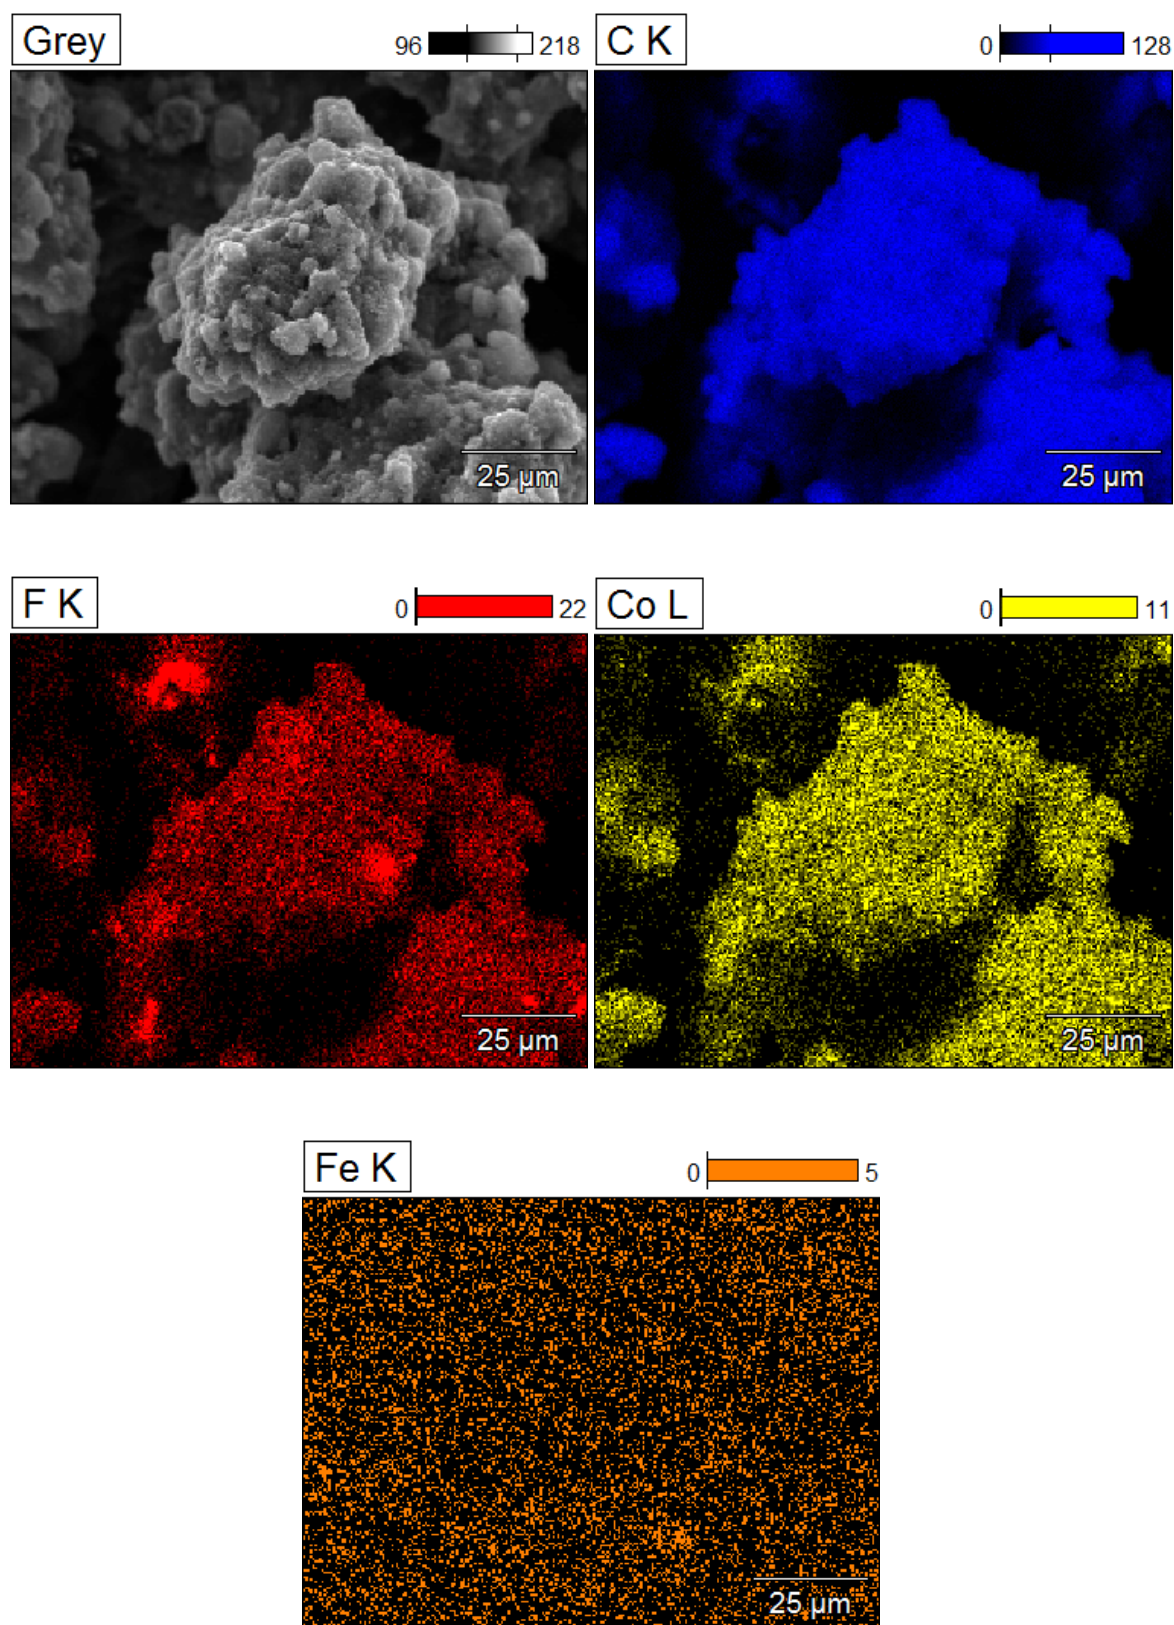

**Fig. S5** The scanning electron microscope image (SEM) and energy-dispersive X-ray spectroscopy (EDX) maps of a sample of the surface of the cathode electrode containing the FeCoPc/C electrocatalyst (3% wt. metal content,  $<0.01 \text{ mg cm}^{-2}$  metal loading) and the ETFE-based radiation grafted AEI ionomer powder (20% wt. in electrode,  $\text{IEC} = 1.26 \pm 0.06 \text{ mmol g}^{-1}$ ). These were recorded using a Noran system seven (v. 3.1) ultradry SSD X-ray detector coupled to a JSM-7100F Field Emission SEM. Magnification = 1000 $\times$ . Note that the Fe-based EDX map does reliably detect the presence of Fe in the electrode but the presence of Fe was previously proven by XANES and EXAFS [1].



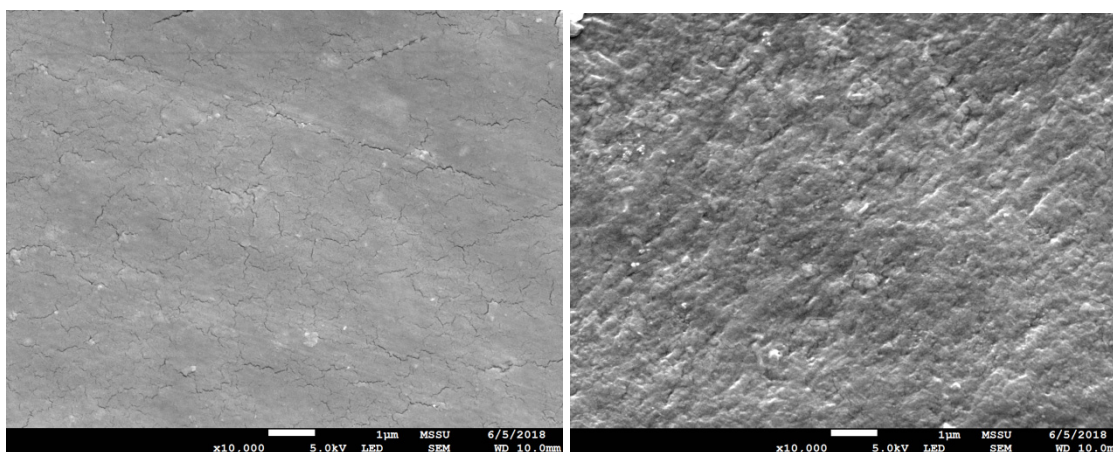

**Fig. S6** Surface SEM for a sample of **LDPE15-AEM** recorded before and after the 500 h 80 °C *ex situ* stability test (presented in Fig. 3 in the main article). A 2 nm Au coating (75 mA) was applied to the surface of each sample. The scale bars represent 1  $\mu\text{m}$ .

**Table S1** Comparison of the key grafting conditions used to synthesise **LDPE15-AEM** and **LDPE25-AEM**.

| AEM                               | LDPE15-AEM  | LDPE25-AEM  |
|-----------------------------------|-------------|-------------|
| Grafting mixture temperature / °C | 40          | 55          |
| Grafting time / h                 | 6           | 16          |
| IEC / mmol g <sup>-1</sup>        | 2.54 ± 0.21 | 2.87 ± 0.05 |

**Table S2** EDX data for a sample of **LDPE15-AEM** (average of  $n = 3$  EDX spectra on different areas of the same sample) recorded before and after the 500 h 80 °C *ex situ* stability test (presented in Fig. 3 in the main article). The post-degradation AEM was converted back the Cl<sup>-</sup> form before EDX analysis to allow comparison with the Cl<sup>-</sup> form pre-degraded AEM. The data was corrected by removal of Au contents from the percentages in the table (a 2 nm Au coating was applied to the surface of each sample for SEM/EDX). These EDX experiments were not sensitive enough to detect the amine-related N content in these AEMs. Note that unlike the (bulk) conductivity, IEC and Raman data presented in the main text, EDX data is biased towards the surface of the AEMs, where a higher level of degradation is expected.

| Element Line    | Weight %    |             | Atom %      |             |
|-----------------|-------------|-------------|-------------|-------------|
|                 | Start (0 h) | End (500 h) | Start (0 h) | End (500 h) |
| C <sub>K</sub>  | 72.4 ± 1.2  | 80.7 ± 0.8  | 88.6 ± 1.0  | 92.5 ± 0.9  |
| Cl <sub>K</sub> | 27.6 ± 2.9  | 19.3 ± 3.1  | 11.4 ± 1.2  | 7.5 ± 1.2   |
| Total           | 100.0       | 100.0       | 100.0       | 100.0       |

#### References to ESI:

- [1] V. Bambagioni, C. Bianchini, J. Filippi, A. Lavacchi, W. Oberhauser, A. Marchionni, S. Moneti, F. Vizza, R. Psaro, V. Dal Santo, A. Gallo, S. Recchia and L. Sordelli, *J. Power Sources*, 2011, **196**, 2519-2529.
